# Supplementary material for: Electroencephalographic Fractal Dimension in Healthy Ageing and Alzheimer’s Disease
Source: PLoS One. 2016 Feb 12;11(2):e0149587. doi: 10.1371/journal.pone.0149587 (PMC4752290; doi:10.1371/journal.pone.0149587)
Supplement: S1 Dataset — (XLSX) [file pone.0149587.s001.xlsx]

## Sheet: data
Subj_Nr	MMSE	Age	NCC	Fp2_1HFD	Fp1_2HFD	F8_3HFD	F4_4HFD	AFz_5HFD	F3_6HFD	F7_7HFD	T4_8HFD	C4_9HFD	Cz_10HFD	C3_11HFD	T3_12HFD	P8_13HFD	P4_14HFD	Pz_15HFD	P3_16HFD	P7_17HFD	O2_18HFD	O1_19HFD
1	26.7	72		1.90464	1.88209	1.90646	1.88914	1.91357	1.90605	1.90271	1.91025	1.89188	1.88226	1.89034	1.86596	1.84219	1.85588	1.82348	1.92798	1.93036	1.87156	1.91506
2	26	58	-1.67	1.953	1.92912	1.96174	1.89848	1.95061	1.95632	1.93786	1.94804	1.94538	1.95563	1.91939	1.95039	1.91878	1.91472	1.90343	1.93472	1.9201	1.90934	1.92009
3	27.3	70	0.13	1.89478	1.89799	1.91315	1.92503	1.90252	1.912	1.90309	1.89529	1.89226	1.89822	1.89254	1.85666	1.8959	1.89547	1.91562	1.9103	1.90419	1.90826	1.90112
4	24.5	81	0.58	1.88124	1.86412	1.8558	1.82549	1.90813	1.91859	1.90751	1.8961	1.90941	1.89611	1.87474	1.73662	1.65432	1.79291	1.67671	1.88104	1.86541	1.89464	1.8405
5	12.5	61	6.55	1.79239	1.7915	1.81077	1.8291	1.81016	1.81661	1.80948	1.81806	1.80831	1.80546	1.81425	1.77856	1.73794	1.7464	1.74559	1.81785	1.83214	1.83706	1.83362
6	12	68	5.25	1.93826	1.95122	1.87845	1.88691	1.88254	1.90064	1.85239	1.84883	1.87543	1.85483	1.83792	1.90159	1.91258	1.87862	1.86924	1.85954	1.86146	1.83973	1.73404
7	24.7	64	2.98	1.92085	1.9231	1.94366	1.96486	1.96112	1.96168	1.96369	1.95974	1.95936	1.9205	1.93914	1.93304	1.92686	1.92895	1.92721	1.96142	1.96299	1.95929	1.95519
8	28.4	72	3.08	1.93481	1.9396	1.89799	1.983	1.93353	1.94007	1.93335	1.92759	1.87601	1.89248	1.93437	1.90927	1.90817	1.92176	1.95412	1.93841	1.96556	1.9326	1.965
9	28.7	76	1.81	1.89757	1.92438	1.9118	1.89837	1.91258	1.92117	1.88915	1.90467	1.90676	1.92021	1.90237	1.91966	1.8805	1.89203	1.89713	1.89698	1.9116	1.90689	1.90423
10	25	79	-0.72	1.9184	1.91319	1.9814	1.91995	1.92968	1.86615	1.98524	1.93918	1.92115	1.80161	1.93165	1.73225	1.81394	1.85424	1.86325	1.95776	1.93707	1.87306	1.94546
11	24	54	-1.55	1.86394	1.8688	1.8258	1.87454	1.88089	1.86749	1.85567	1.86746	1.87955	1.84731	1.83262	1.81092	1.83492	1.80251	1.86008	1.86216	1.8814	1.86309	1.8839
12	24	56	-3.07	1.85841	1.86945	1.85311	1.87578	1.86557	1.8689	1.85777	1.85016	1.86667	1.84878	1.85194	1.90922	1.85966	1.82507	1.81084	1.92853	1.9587	1.8742	1.89079
13	25	59	-1.99	1.90263	1.90734	1.92663	1.92519	1.91958	1.91651	1.91182	1.8891	1.89109	1.88481	1.87596	1.91914	1.91039	1.8661	1.8572	1.9237	1.9102	1.87955	1.91982
14	22.4	69	-1.47	1.88244	1.96103	1.94492	1.99437	1.9643	1.95745	1.9571	1.95252	1.93429	1.91826	1.92212	1.91276	1.96043	1.90283	1.97454	1.97041	1.97143	1.95826	1.95037
15	20.7	80	-0.84	1.77912	1.77986	1.78588	1.80786	1.76429	1.75245	1.80948	1.79947	1.77348	1.79104	1.77293	1.68534	1.74152	1.75622	1.78328	1.81785	1.80523	1.82304	1.73404
16	22	77	-1.16	1.95486	1.9459	1.94937	1.92766	1.95815	1.95566	1.94505	1.92666	1.94121	1.91689	1.9284	1.92346	1.89983	1.92925	1.94432	1.92741	1.94197	1.93396	1.91679
17	20.7	72	-0.4	1.94711	1.95097	1.95567	1.96169	1.96646	1.94953	1.85429	1.92775	1.9122	1.75635	1.89935	1.97748	1.91916	1.94573	1.9336	1.94071	1.94822	1.94555	1.92418
18	17.7	72	-0.2	1.84658	1.88442	1.86785	1.89179	1.86733	1.89444	1.91315	1.87258	1.88618	1.86311	1.87818	1.84943	1.84704	1.8551	1.82819	1.9276	1.90333	1.94758	1.90416
19	18.7	80	-3.28	1.98184	1.91207	1.8515	1.84355	1.94584	1.88717	1.89513	1.83612	1.8976	1.89499	1.85933	1.98541	1.93938	1.84002	1.8093	1.88303	1.80523	1.89585	1.8276
20	14.5	61	-4.97	1.99748	1.98443	1.98447	2.00588	1.99849	1.99907	2.02118	1.96984	2.00253	1.97254	1.96584	1.98541	1.99118	1.99105	2.007	1.98687	2.00466	2.00594	1.96269
21	16	69	1.18	1.91689	1.9139	1.92024	1.92735	1.92491	1.92194	1.90591	1.90802	1.91186	1.92316	1.9084	1.93578	1.91214	1.9213	1.8992	1.88428	1.91046	1.90846	1.91337
22	12.1	84	-2.92	1.89692	1.8678	1.85463	1.87692	1.90673	1.88909	1.893	1.87334	1.88469	1.8929	1.82171	1.84182	1.80706	1.87109	1.86261	1.89282	1.87831	1.87454	1.87357
23	14	52	1.29	1.88426	1.89571	1.86656	1.89146	1.88014	1.92881	1.87948	1.86521	1.85621	1.8799	1.84125	1.86038	1.8573	1.89694	1.87346	1.842	1.87464	1.95708	1.87809
24	17	62	1.32	1.79611	1.76833	1.80351	1.82662	1.8298	1.75245	1.85004	1.85395	1.77735	1.84562	1.83282	1.81257	1.73524	1.77539	1.77321	1.8574	1.86949	1.83641	1.88942
25	16.4	73	1.56	1.93045	1.91201	1.91889	1.87911	1.93814	1.92105	1.91614	1.90156	1.90644	1.8937	1.87627	1.89051	1.86285	1.88547	1.82961	1.90149	1.87893	1.87565	1.85906
26	18.5	85	-2.45	1.92289	1.93146	1.93391	1.92789	1.93819	1.93884	1.93371	1.90638	1.93619	1.91071	1.92937	1.89842	1.90426	1.89837	1.92104	1.93543	1.93738	1.94232	1.92567
27	29	64	1.4	1.92518	1.92648	1.93454	1.93099	1.9536	1.93925	1.92962	1.94285	1.9254	1.92217	1.93657	1.8665	1.88847	1.86444	1.9197	1.94618	1.93475	1.94626	1.94376
28	30	62	0.78	1.93756	1.93365	1.90005	1.90324	1.94104	1.93141	1.93032	1.92931	1.93048	1.92159	1.93485	1.92924	1.93199	1.90774	1.90289	1.92121	1.92258	1.93347	1.92852
29	27	77	-1.37	1.95608	1.94502	1.9378	1.91508	1.96291	1.95854	1.94687	1.94743	1.93617	1.95145	1.92108	1.93698	1.96312	1.90544	1.90414	1.94426	1.92669	1.95287	1.93929
30	27.4	89	0.65	1.90464	1.88209	1.82802	1.88647	1.89537	1.90605	1.89543	1.88873	1.85491	1.83022	1.86584	1.86144	1.84219	1.79615	1.79972	1.90927	1.8628	1.87156	1.89294
31	26.7	76	-0.88	1.91078	1.91171	1.98449	1.89549	1.93455	1.91317	1.94815	1.93157	1.85491	1.83022	1.86584	1.86144	1.89891	1.88945	1.86079	1.96657	1.93725	1.93907	1.9353
32	29	60	-0.19	1.91662	1.91444	1.91668	1.95634	1.92526	1.92482	1.93071	1.92431	1.93448	1.92659	1.93828	1.89789	1.87677	1.85116	1.85903	1.93608	1.92907	1.94434	1.93018
33	26.3	70	-2.94	1.92616	1.9208	1.94077	1.92282	1.93202	1.93431	1.9207	1.93137	1.92168	1.92098	1.90077	1.91664	1.93179	1.91629	1.90597	1.93301	1.93735	1.92107	1.92495
34	30	61	-2.76	1.93125	1.96254	1.90184	1.88647	1.93627	1.94259	1.94033	1.94473	1.92701	1.92386	1.92003	1.9379	1.94774	1.79615	1.7674	1.94694	1.93978	1.9358	1.94286
35	24.1	84	-1.47	1.92426	1.93721	1.93068	1.91045	1.76429	1.92921	1.93163	1.94106	1.87807	1.91134	1.90721	1.89477	1.90542	1.87506	1.87652	1.93391	1.96111	1.93521	1.93666
36	25.4	71	-1.28	1.95349	1.93692	1.92133	1.98745	1.97183	1.97217	1.94942	1.96118	1.94175	1.95854	1.94318	1.91295	1.90319	1.93165	1.89748	1.95469	1.94366	1.93697	1.93268
37	26.4	74	-2.6	1.94798	1.94513	1.96152	1.95336	1.96842	1.95769	1.96087	1.95886	1.94696	1.94444	1.94232	1.87335	1.94053	1.92274	1.9323	1.96834	1.97554	1.9619	1.94958
38	19.3	74	-0.08	1.90147	1.90946	1.87028	1.8945	1.89032	1.88882	1.89059	1.88851	1.87488	1.86355	1.88493	1.86638	1.93494	1.83111	1.83092	1.88406	1.88203	1.89537	1.89975
39	22.3	88	2.86	1.98501	1.96217	1.9525	1.96633	1.95312	1.96368	1.93429	1.93716	1.94848	1.93897	1.92802	1.96058	1.94657	1.96834	1.94325	1.95453	1.96584	1.93085	1.94707
40	21	79	3.56	1.92593	1.9244	1.9182	1.90095	1.9486	1.95399	1.94141	1.95169	1.94734	1.95089	1.93747	1.87591	1.88917	1.84356	1.81734	1.93231	1.93324	1.92941	1.93649
41	20.7	70	1.81	1.91121	1.88642	1.89488	1.93712	1.93099	1.90238	1.91392	1.835	1.88177	1.88258	1.84401	1.83571	1.81624	1.86382	1.85491	1.88495	1.8511	1.84717	1.8142
42	24	63	1.93	1.89803	1.93111	1.89954	1.92074	1.90497	1.91808	1.89748	1.92053	1.90273	1.8794	1.88719	1.89775	1.90689	1.89245	1.84833	1.92529	1.9318	1.91983	1.92678
43	21	64	3.83	1.84158	1.84733	1.87761	1.84589	1.88231	1.85653	1.91176	1.91764	1.89158	1.83812	1.86368	1.74281	1.76017	1.72616	1.71029	1.90317	1.90069	1.91434	1.93667
44	23.3	79	8.33	1.97343	1.94917	1.98447	1.97603	1.99849	1.93959	1.96252	1.92569	1.96144	1.97254	1.96584	1.84619	1.8997	1.96234	1.85128	1.97887	1.95422	1.96785	1.99124
45	21	78	6.77	1.92634	1.91008	1.8955	1.91052	1.9192	1.87686	1.91247	1.91589	1.87658	1.92143	1.91008	1.89724	1.88595	1.84592	1.90346	1.91327	1.90831	1.92198	1.92706
46	19.7	83	2.03	1.85701	1.86521	1.78588	1.85466	1.88817	1.86543	1.83594	1.8753	1.88097	1.86291	1.86945	1.82635	1.83188	1.75366	1.79296	1.85505	1.89125	1.88646	1.88796
47	18.7	81	1.84	1.90971	1.94094	1.91233	1.96567	1.92379	1.94084	1.92155	1.91606	1.90767	1.92195	1.90211	1.87642	1.88199	1.90733	1.89933	1.92654	1.93214	1.91855	1.90392
48	19	50	7.22	1.82325	1.83302	1.85459	1.8545	1.84664	1.86772	1.8712	1.88088	1.86164	1.81991	1.83614	1.86199	1.7717	1.67807	1.71424	1.87977	1.88343	1.87383	1.87033
49	11.5	64	4.19	1.83329	1.86418	1.87175	1.88407	1.91711	1.86371	1.92507	1.88866	1.90432	1.93348	1.89474	1.68534	1.75253	1.77866	1.79933	1.91446	1.93091	1.91118	1.89511
50	19.3	72	7.87	1.8201	1.80407	1.95913	1.81571	1.86822	1.83382	1.84283	1.79947	1.77348	1.77998	1.77293	1.80468	1.78534	1.79139	1.77888	1.85419	1.81856	1.85386	1.80424
51	19.4	80	4.12	1.96583	1.95841	1.98	1.96933	1.96626	1.97643	1.95462	1.94149	1.9354	1.93307	1.93752	1.97766	1.95991	1.97599	1.88708	1.93993	1.97722	1.95051	1.9692
52	13.4	80	3.8	1.93467	1.86724	1.93215	1.94879	1.94337	1.96698	1.92614	1.94696	1.93073	1.93711	1.91911	1.93164	1.92126	1.91505	1.91498	1.93064	1.95242	1.93639	1.93512
53	28	61	4.21	1.90933	1.90497	1.8922	1.8895	1.93171	1.9113	1.93255	1.92434	1.90288	1.87047	1.89001	1.87424	1.87121	1.85927	1.85508	1.91767	1.8628	1.91925	1.90102
54	27.4	85	2.33	1.90464	1.9317	1.92472	1.94139	1.89572	1.91878	1.89543	1.88873	1.85532	1.85289	1.86584	1.86144	1.8523	1.90078	1.92722	1.90927	1.90087	1.87156	1.89294
55	23.1	78	2.04	1.93093	1.98443	1.9044	1.99017	1.94685	1.98564	1.9294	1.96984	1.89105	1.91975	1.91217	1.88032	1.92809	1.89928	1.98398	1.92172	1.97536	1.91058	1.92504
56	22.7	75	2.5	1.85524	1.88973	1.89526	1.90893	1.9193	1.90538	1.92394	1.92819	1.89969	1.89498	1.89323	1.84567	1.85961	1.87085	1.87597	1.91361	1.91443	1.90971	1.89418
57	23.3	73	2.31	1.95153	1.95412	1.96099	1.96042	1.95736	1.95813	1.93898	1.93628	1.90521	1.89165	1.91428	1.88257	1.91406	1.94861	1.93728	1.95604	1.96489	1.94833	1.91017
58	23	66	1.71	1.77912	1.88504	1.93816	1.9014	1.93755	1.93271	1.9025	1.91959	1.92543	1.87337	1.89781	1.81111	1.84061	1.79558	1.87906	1.83587	1.90196	1.87273	1.92229
59	25.3	66	3.74	1.87013	1.86779	1.86873	1.87072	1.88335	1.89605	1.8995	1.87439	1.8856	1.8733	1.86426	1.79431	1.80441	1.78405	1.82308	1.9345	1.8791	1.92422	1.86771
60	23.3	71	-1.19	1.87849	1.87611	1.83264	1.96049	1.87852	1.89101	1.89338	1.92029	1.8873	1.85385	1.84531	1.92412	1.87208	1.73793	1.82229	1.91523	1.95238	1.9091	1.92335
61	20.4	81	-1.29	1.83815	1.84629	1.84307	1.80786	1.83482	1.83076	1.84186	1.80968	1.85903	1.84079	1.8274	1.78695	1.78377	1.82251	1.84344	1.84186	1.81095	1.82304	1.80861
62	20.4	81	1.53	1.8766	1.94692	1.90131	1.95206	1.90239	1.9172	1.88025	1.86112	1.85481	1.8614	1.80887	1.91853	1.93374	1.8275	1.94975	1.8517	1.88084	1.84871	1.83583
63	25.7	73	0.8	1.89347	1.86591	1.86302	1.85654	1.85867	1.86554	1.9036	1.89297	1.89764	1.88515	1.88527	1.84964	1.82736	1.82158	1.79079	1.84043	1.89891	1.90655	1.89781
64	20.7	80	-3.96	1.99748	1.95497	1.95484	2.00588	1.98658	1.96876	2.02118	1.95204	2.00253	1.96774	1.95283	1.97652	1.99118	1.99105	2.007	1.96942	2.00466	2.00594	1.96695
65	23.7	81	0.73	1.94578	1.93743	1.91992	1.91932	1.94157	1.93847	1.9346	1.91755	1.92276	1.92099	1.91739	1.94627	1.92968	1.89939	1.94473	1.93173	1.93012	1.9342	1.93387
66	23.8	87	1	1.94179	1.94522	1.93188	1.948	1.94498	1.94405	1.94445	1.92427	1.92595	1.9336	1.92881	1.91027	1.93043	1.89742	1.89994	1.97998	1.9465	1.93569	1.93403
67	16.4	72	1.4	1.89487	1.89157	1.89142	1.92069	1.85067	1.86776	1.90945	1.86089	1.89519	1.82411	1.86291	1.86227	1.84957	1.8729	1.88174	1.88053	1.88246	1.8711	1.881
68	19.2	66	0.83	1.85358	1.92242	1.92271	1.91954	1.94206	1.91367	1.93329	1.93596	1.92978	1.92806	1.88821	1.8103	1.88548	1.87736	1.91325	1.91037	1.92265	1.91051	1.91084
69	30	63	-1.17	1.9654	1.89994	1.82802	1.94431	1.98303	1.95486	1.97769	1.9274	1.9454	1.93319	1.92323	1.95953	1.84471	1.94164	1.94333	1.982	1.95843	2.01477	1.99001
70	25.7	75	1.2	1.93828	1.95234	1.92984	1.93458	1.94835	1.93749	1.95767	1.94094	1.92127	1.92391	1.90963	1.93653	1.93781	1.88262	1.9326	1.99302	1.88516	1.91485	1.90963
71	23.4	72	-1.93	1.89808	1.89002	1.89288	1.88609	1.89928	1.89213	1.89525	1.89239	1.89494	1.89533	1.88103	1.83927	1.8398	1.85464	1.87018	1.89148	1.88648	1.85399	1.87705
72	25.4	66	-1.34	1.88641	1.89174	1.90482	1.87387	1.90307	1.90392	1.90885	1.91972	1.89117	1.88904	1.86181	1.84358	1.88217	1.86389	1.8293	1.91317	1.90683	1.88306	1.90109
73	26.2	67	1.5	1.91171	1.90203	1.9341	1.89528	1.93213	1.94404	1.92957	1.94275	1.90187	1.88065	1.92027	1.86096	1.89408	1.88295	1.88148	1.94267	1.93294	1.9448	1.94028
74	23	75	-1.35	1.96551	1.90216	1.9747	1.91319	1.95445	1.94559	1.94682	1.94465	1.92799	1.93815	1.92719	1.96944	1.95799	1.89596	1.94622	1.95439	1.95527	1.93282	1.92591
75	22.3	77	1.79	1.95532	1.93531	1.94072	1.94604	1.93673	1.92884	1.92909	1.91508	1.93748	1.90671	1.914	1.97651	1.95874	1.91288	1.85974	1.96434	1.98349	1.94102	1.94655
76	22	75	1.94	1.93605	1.94136	1.95351	1.94675	1.9419	1.91773	1.91183	1.90728	1.84957	1.89645	1.85966	1.88513	1.89463	1.85259	1.91259	1.98687	1.92965	1.90505	1.87213
77	22.3	71	4.17	1.87925	1.89798	1.94594	1.94751	1.90642	1.91392	1.90956	1.9111	1.8889	1.8656	1.87776	1.84273	1.85291	1.85634	1.88213	1.92649	1.94943	1.89689	1.90111
78	17.4	87	2.42	1.89462	1.89969	1.90272	1.9146	1.91082	1.92614	1.92212	1.92766	1.8604	1.82939	1.88604	1.88324	1.8477	1.85196	1.84889	1.90743	1.90835	1.91676	1.91111
79	14.4	69	4.84	1.84578	1.84452	1.87355	1.83454	1.85412	1.855	1.83488	1.84598	1.82141	1.84646	1.83185	1.81536	1.78661	1.77025	1.77282	1.83998	1.83871	1.84271	1.8363
80	12.7	76	4.59	1.8703	1.86471	1.85705	1.87704	1.91048	1.88442	1.88373	1.8882	1.86431	1.88237	1.88507	1.79925	1.8138	1.78472	1.80247	1.89282	1.87436	1.86812	1.88643
81	14.7	78	4.9	1.8824	1.86698	1.83974	1.88426	1.90346	1.88789	1.90297	1.87107	1.85697	1.88704	1.83992	1.8439	1.85797	1.81363	1.85203	1.83473	1.87449	1.89565	1.88615
82	15	79	5.19	1.92462	1.899	1.95842	1.94895	1.93463	1.92814	1.90941	1.93747	1.85694	1.86755	1.85746	1.83711	1.79124	1.86387	1.86451	1.92618	1.90986	1.90812	1.91562
83	26.7	70	2.22	1.9097	1.91315	1.96084	1.94298	1.89537	1.91526	1.89543	1.88873	1.88352	1.92358	1.89048	1.87911	1.8684	1.93949	1.92783	1.90927	1.88773	1.90275	1.89294
84	25.9	67	2.27	1.94387	1.92191	1.95797	1.93409	1.95031	1.93555	1.93283	1.91903	1.90988	1.92106	1.91908	1.9179	1.898	1.95479	1.87957	1.92262	1.92298	1.92468	1.90788
85		38		1.94603	1.95067	1.94536	1.94484	1.9392	1.9447	1.9486	1.93746	1.95282	1.94289	1.95317	1.9414	1.93065	1.94542	1.93707	1.93726	1.93991	1.93725	1.93887
86		41		1.95766	1.95966	1.95779	1.95412	1.95468	1.95487	1.95881	1.96278	1.9629	1.95218	1.96611	1.96583	1.95052	1.96077	1.95785	1.96284	1.95387	1.95073	1.95472
87		24		1.94877	1.94535	1.95434	1.93832	1.93798	1.93827	1.94631	1.95169	1.95108	1.94535	1.95383	1.94763	1.95013	1.95002	1.94626	1.95606	1.95299	1.95198	1.95436
88		27		1.93154	1.92976	1.92784	1.92641	1.92755	1.93645	1.93524	1.92782	1.94715	1.92162	1.95846	1.9411	1.9376	1.93019	1.91712	1.92716	1.93293	1.93409	1.93502
89		32		1.95635	1.95636	1.95474	1.95862	1.95471	1.96159	1.95043	1.95444	1.96324	1.94567	1.97224	1.95677	1.97714	1.95751	1.94576	1.96055	1.95842	1.97603	1.96277
90		26		1.95803	1.94889	1.94881	1.952	1.95181	1.94324	1.95368	1.94943	1.93993	1.93775	1.95063	1.94744	1.93987	1.95527	1.93918	1.94763	1.95113	1.9579	1.9637
91		30		1.95532	1.95192	1.94685	1.96132	1.95692	1.96377	1.94305	1.94168	1.96351	1.96064	1.96658	1.95163	1.95849	1.95709	1.95083	1.95722	1.96547	1.95752	1.95776
92		26		1.94165	1.93506	1.93692	1.93998	1.9385	1.93562	1.92854	1.92435	1.92877	1.92472	1.93313	1.92415	1.94534	1.94558	1.92635	1.93	1.93399	1.94587	1.94336
93		27		1.91983	1.92327	1.92083	1.92319	1.92036	1.92621	1.91492	1.92672	1.93626	1.9109	1.94197	1.91727	1.93332	1.93209	1.9161	1.93139	1.93752	1.93807	1.9607
94		20		1.94894	1.94464	1.94956	1.94722	1.94628	1.94618	1.94229	1.92161	1.92629	1.91235	1.93244	1.92204	1.93859	1.94513	1.94526	1.95204	1.94549	1.94282	1.95199
95		28		1.93875	1.93694	1.92665	1.92943	1.93307	1.94373	1.93706	1.92216	1.94189	1.93101	1.94636	1.93535	1.93808	1.94076	1.92727	1.93843	1.93389	1.94958	1.94134
96		26		1.92756	1.92544	1.9295	1.93541	1.93181	1.93229	1.92541	1.93482	1.94755	1.93547	1.94409	1.93402	1.92917	1.93346	1.92789	1.9416	1.94338	1.92991	1.93896
97		33		1.94799	1.94651	1.94825	1.95025	1.94943	1.94958	1.9482	1.95269	1.9581	1.94986	1.96276	1.95197	1.95263	1.9485	1.94805	1.94952	1.94891	1.95549	1.95051
98		31		1.93817	1.93254	1.92759	1.94573	1.94443	1.94258	1.92839	1.94173	1.94859	1.92476	1.94989	1.93356	1.93826	1.94274	1.93871	1.94178	1.95104	1.93418	1.94408
99		28		1.93725	1.93226	1.93369	1.92774	1.92179	1.9309	1.94189	1.94307	1.93968	1.9285	1.94327	1.9384	1.95153	1.93574	1.92689	1.93189	1.94076	1.91826	1.9264
100		24		1.93361	1.93408	1.93226	1.93392	1.93158	1.93744	1.93498	1.94243	1.94934	1.9396	1.94505	1.9331	1.93154	1.93968	1.93537	1.94471	1.93625	1.93924	1.93874
101		25		1.94635	1.94667	1.94562	1.94013	1.94342	1.94691	1.94824	1.94501	1.95396	1.93121	1.95151	1.95106	1.96423	1.94879	1.93098	1.94971	1.95478	1.96004	1.95171
102		30		1.95941	1.95792	1.95101	1.95082	1.94462	1.95331	1.96433	1.95889	1.95393	1.95424	1.95723	1.9766	1.95431	1.94836	1.94728	1.94874	1.96632	1.9554	1.95563
103		22		1.94106	1.93917	1.94662	1.94265	1.93801	1.94119	1.93756	1.94763	1.94316	1.95151	1.9488	1.93987	1.95328	1.93367	1.93484	1.94439	1.95292	1.95962	1.95989
104		28		1.91983	1.92193	1.91009	1.95041	1.91745	1.92175	1.91492	1.92161	1.92629	1.92513	1.96018	1.9208	1.9265	1.92881	1.9161	1.92716	1.91336	1.9	1.9259
105		49		1.93938	1.94328	1.92099	1.9399	1.94421	1.94335	1.92169	1.92623	1.94393	1.9385	1.95155	1.92165	1.94805	1.94722	1.93849	1.94904	1.95102	1.96145	1.96221
106		38		1.93768	1.9415	1.95429	1.93811	1.93672	1.94311	1.94521	1.94136	1.94938	1.93714	1.94899	1.94086	1.93606	1.94166	1.93428	1.94291	1.93022	1.93182	1.93115
107		26		1.93292	1.92193	1.91823	1.92788	1.91745	1.92175	1.92211	1.92263	1.93653	1.92906	1.93931	1.92981	1.9265	1.92881	1.93838	1.92996	1.91336	1.92825	1.9259
108		48		1.96094	1.9586	1.95539	1.94892	1.94357	1.95087	1.96155	1.95986	1.96085	1.91402	1.95979	1.96276	1.98319	1.96064	1.94546	1.95659	1.97374	1.9594	1.96743
